# Supplementary material
Source: PubMed Central journal article supplement (PMC9237838)
Supplement: NIHMS1805424-supplement-Table_S1.pdf [file NIHMS1805424-supplement-Table_S1.pdf]

**Extended data Table 1**

| <b>Inhibitors</b>                                               | <b>Target(s)</b>                          | <b>Dosage</b>                                                                                    |
|-----------------------------------------------------------------|-------------------------------------------|--------------------------------------------------------------------------------------------------|
| <b><i>Small molecules targeting NRAS signaling pathways</i></b> |                                           |                                                                                                  |
| Binimetinib (MEK162)                                            | MEK1/2                                    | 6µg/10µl (SQ§, 3 times a week for 2 weeks)<br>50µg/5µl (topical, 5 times a week for 2 months)    |
| Trametinib (GSK1120212)                                         | MEK1/2                                    | 1µg/10µl (SQ§, 3 times a week for 2 weeks)<br>10µg/5µl (topical, 5 times a week for 2 months)    |
| Omipalisib (GSK2126458)                                         | PI3K $\alpha,\beta, \gamma,\delta$ , mTOR | 0.3µg/10µl (SQ§, 3 times a week for 2 weeks)<br>50µg/5µl (topical, 5 times a week for 2 months)  |
| <b><i>Melanocyte-selective toxic agent</i></b>                  |                                           |                                                                                                  |
| Imatinib (ST1571)                                               | c-KIT and other RTKs                      | 100µg/10µl (SQ§, 3 times a week for 2 weeks)<br>250µg/5µl (topical, 5 times a week for 2 months) |
| <b><i>Immunological therapeutic agent</i></b>                   |                                           |                                                                                                  |
| SADBE (squaric acid dibutylester)                               | Protein haptens                           | 1.5-2% (topical, 3 times a week for 1 week)<br>0.5% (topical, 3 times a week for 2 weeks)        |

§SQ, subcutaneous injection in 10% DMSO
