# Supplementary material
Source: PubMed Central journal article supplement (PMC9237838)

Figure S1

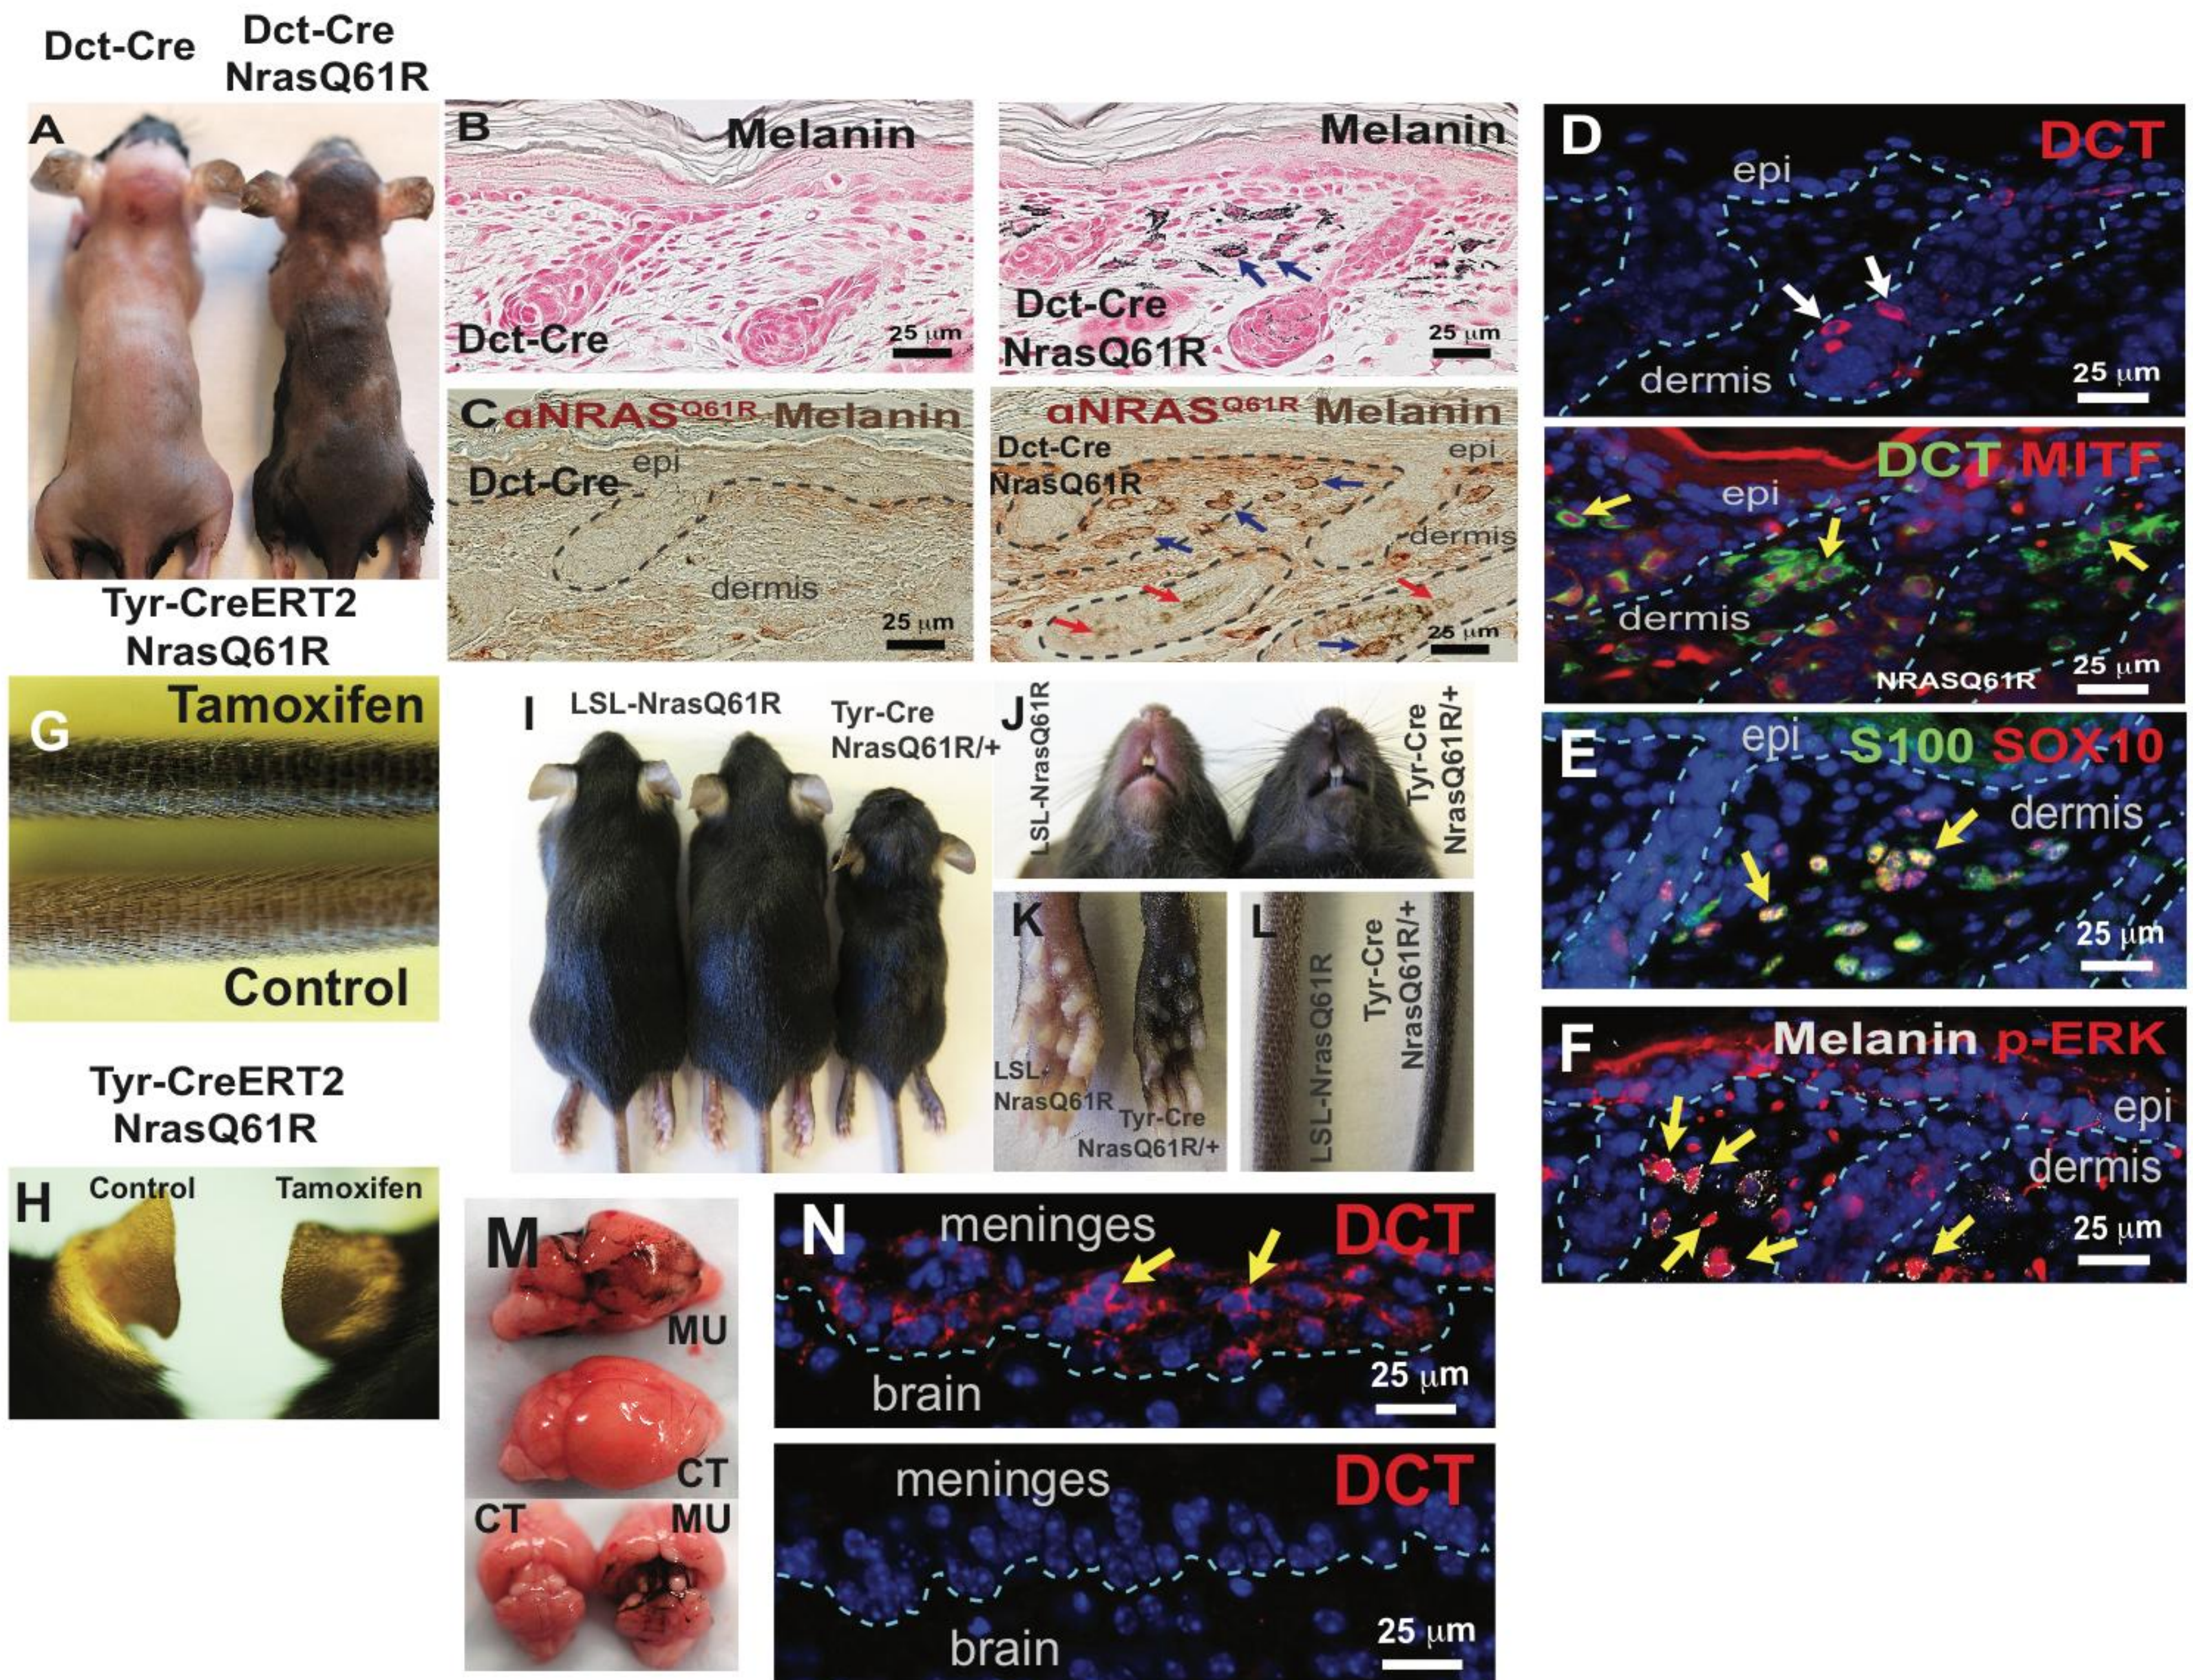

Supplement: NIHMS1805424-supplement-Figure_S1.pdf [file NIHMS1805424-supplement-Figure_S1.pdf]

Figure S2

Human CMN

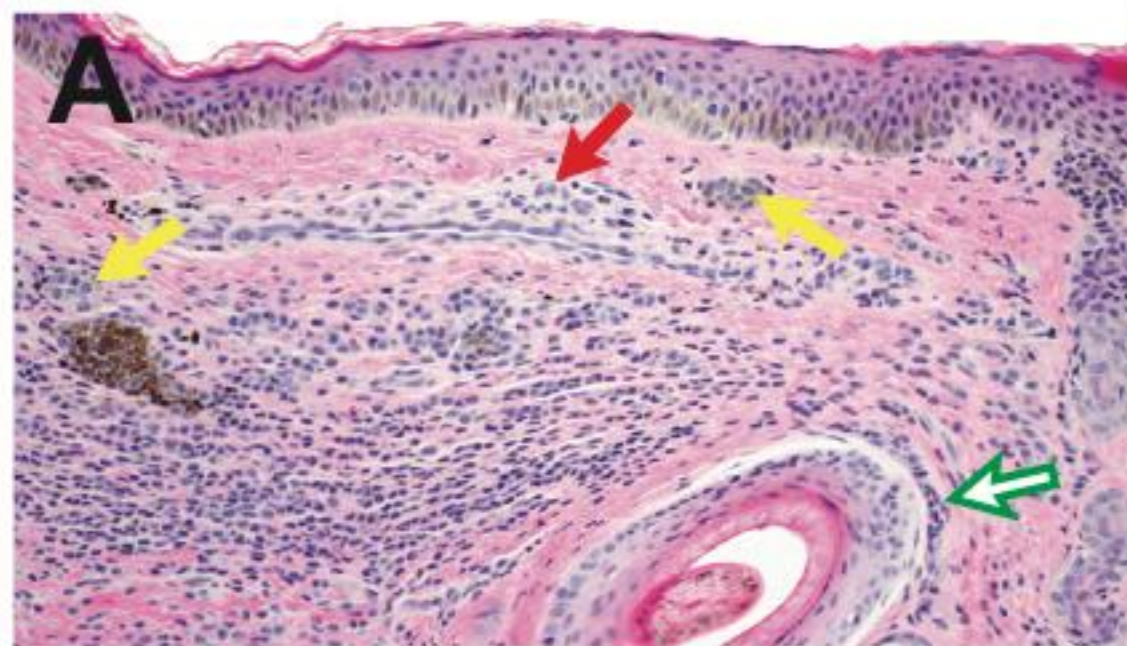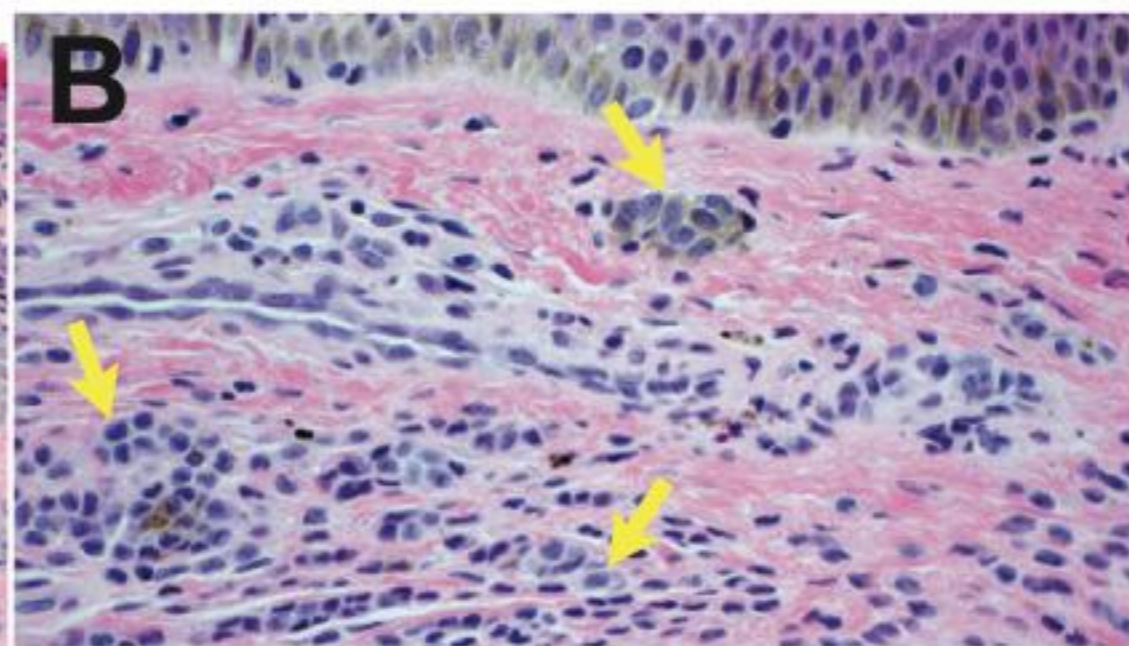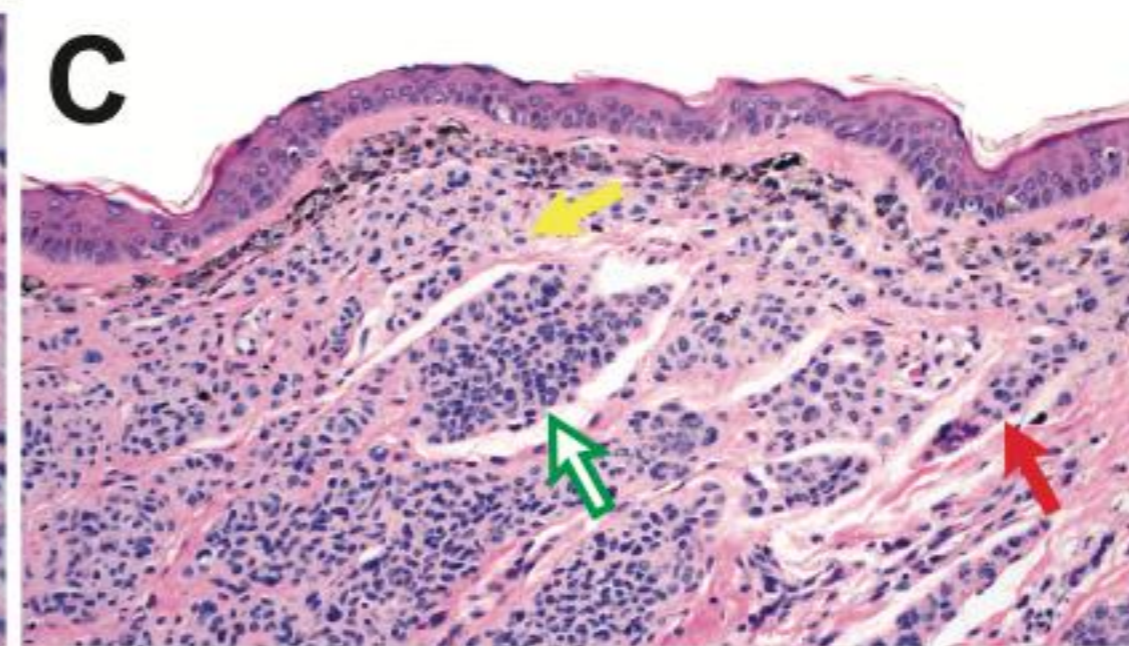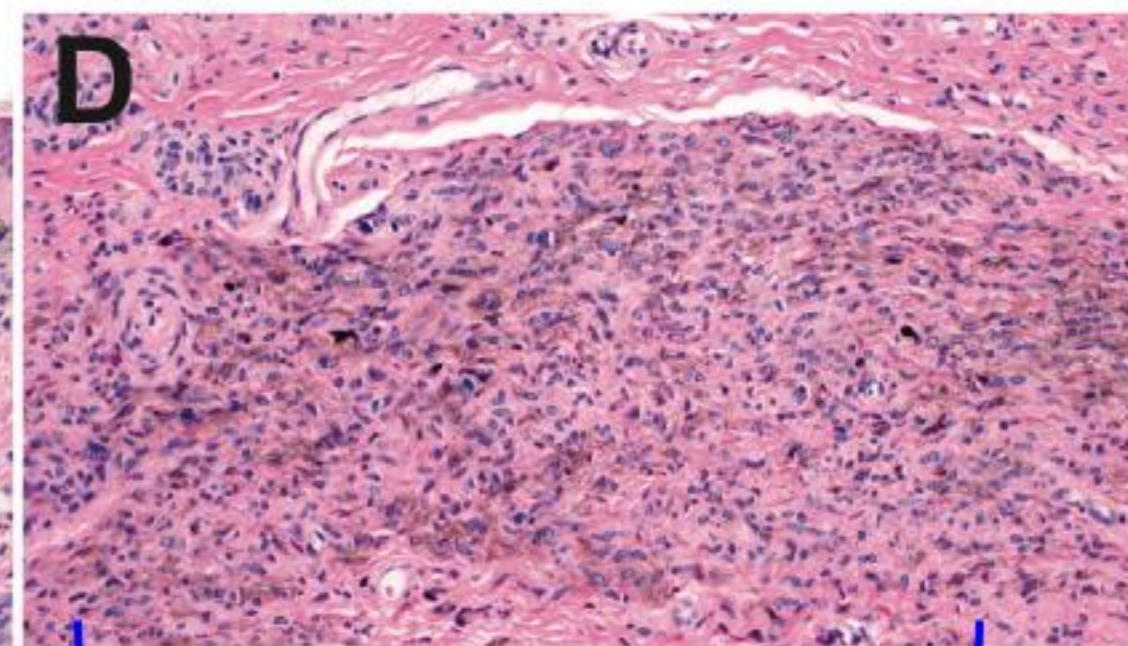

Mouse CMN

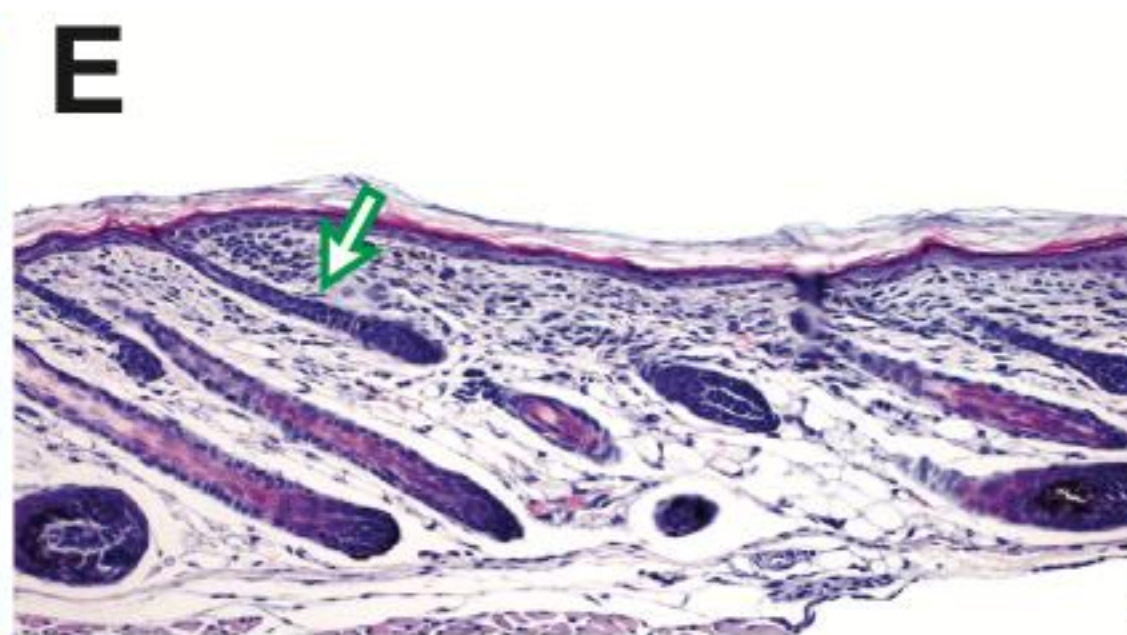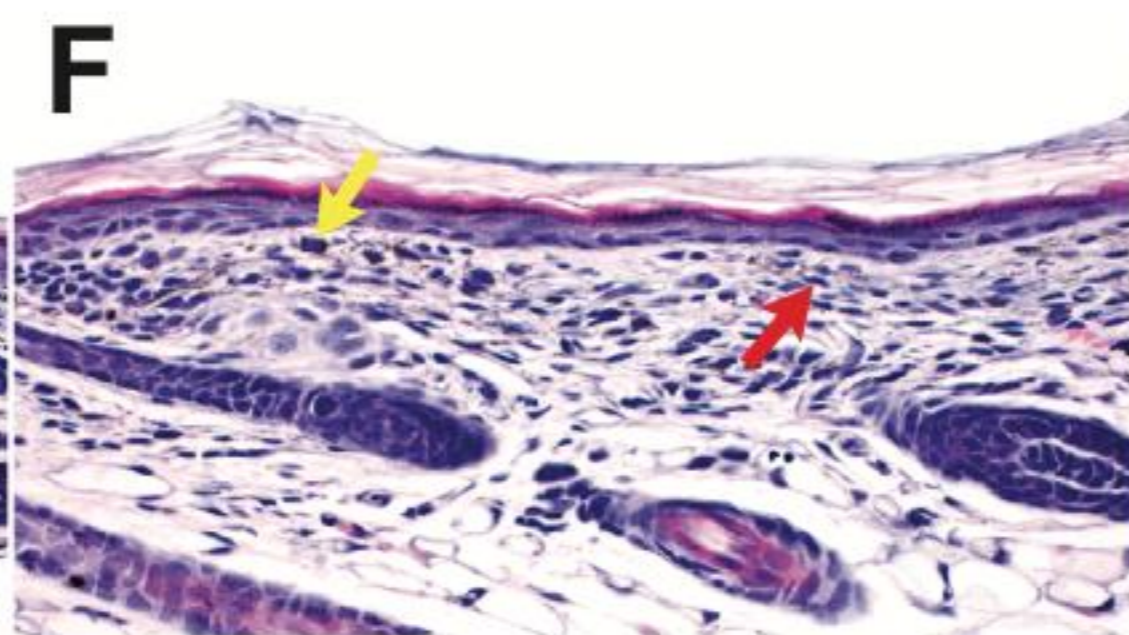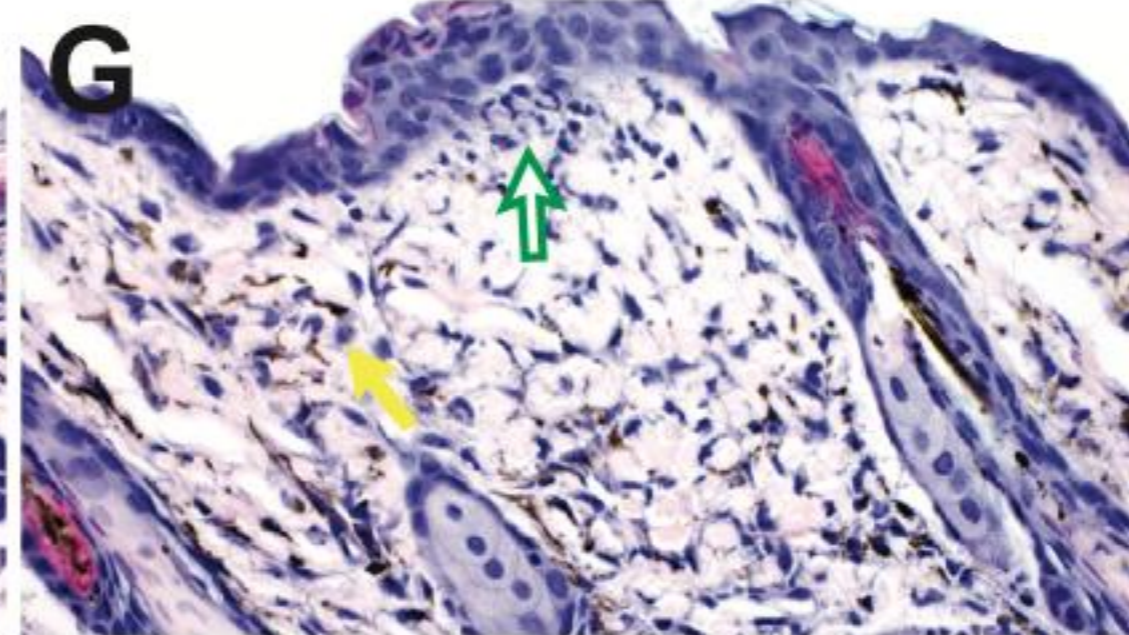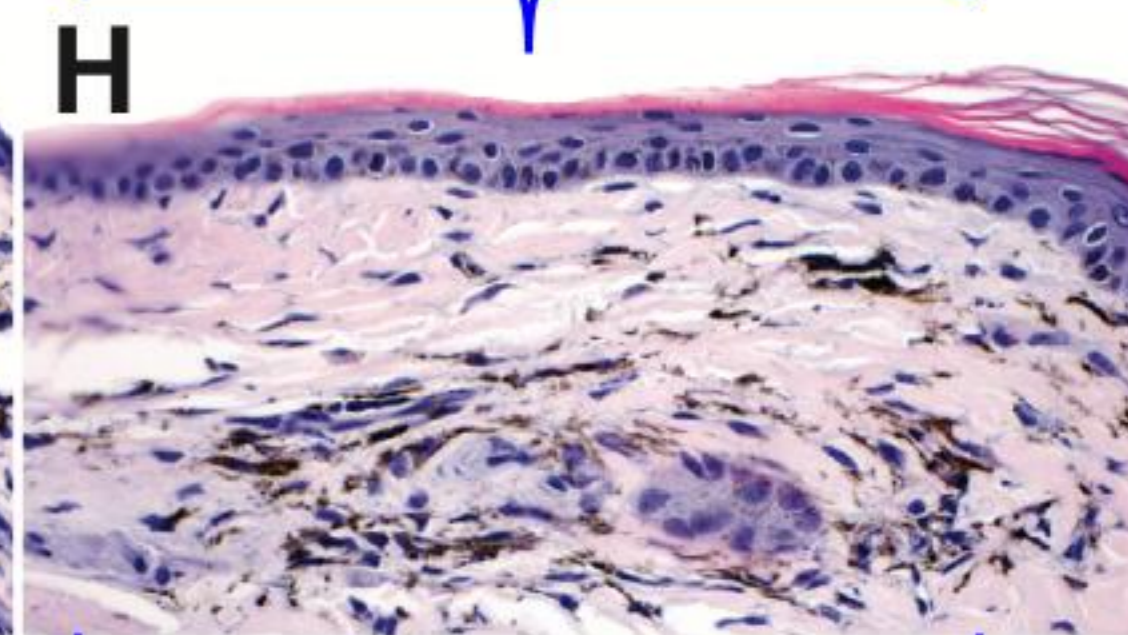

Aggregates of nevus cells

Supplement: NIHMS1805424-supplement-Figure_S2.pdf [file NIHMS1805424-supplement-Figure_S2.pdf]

Figure S3

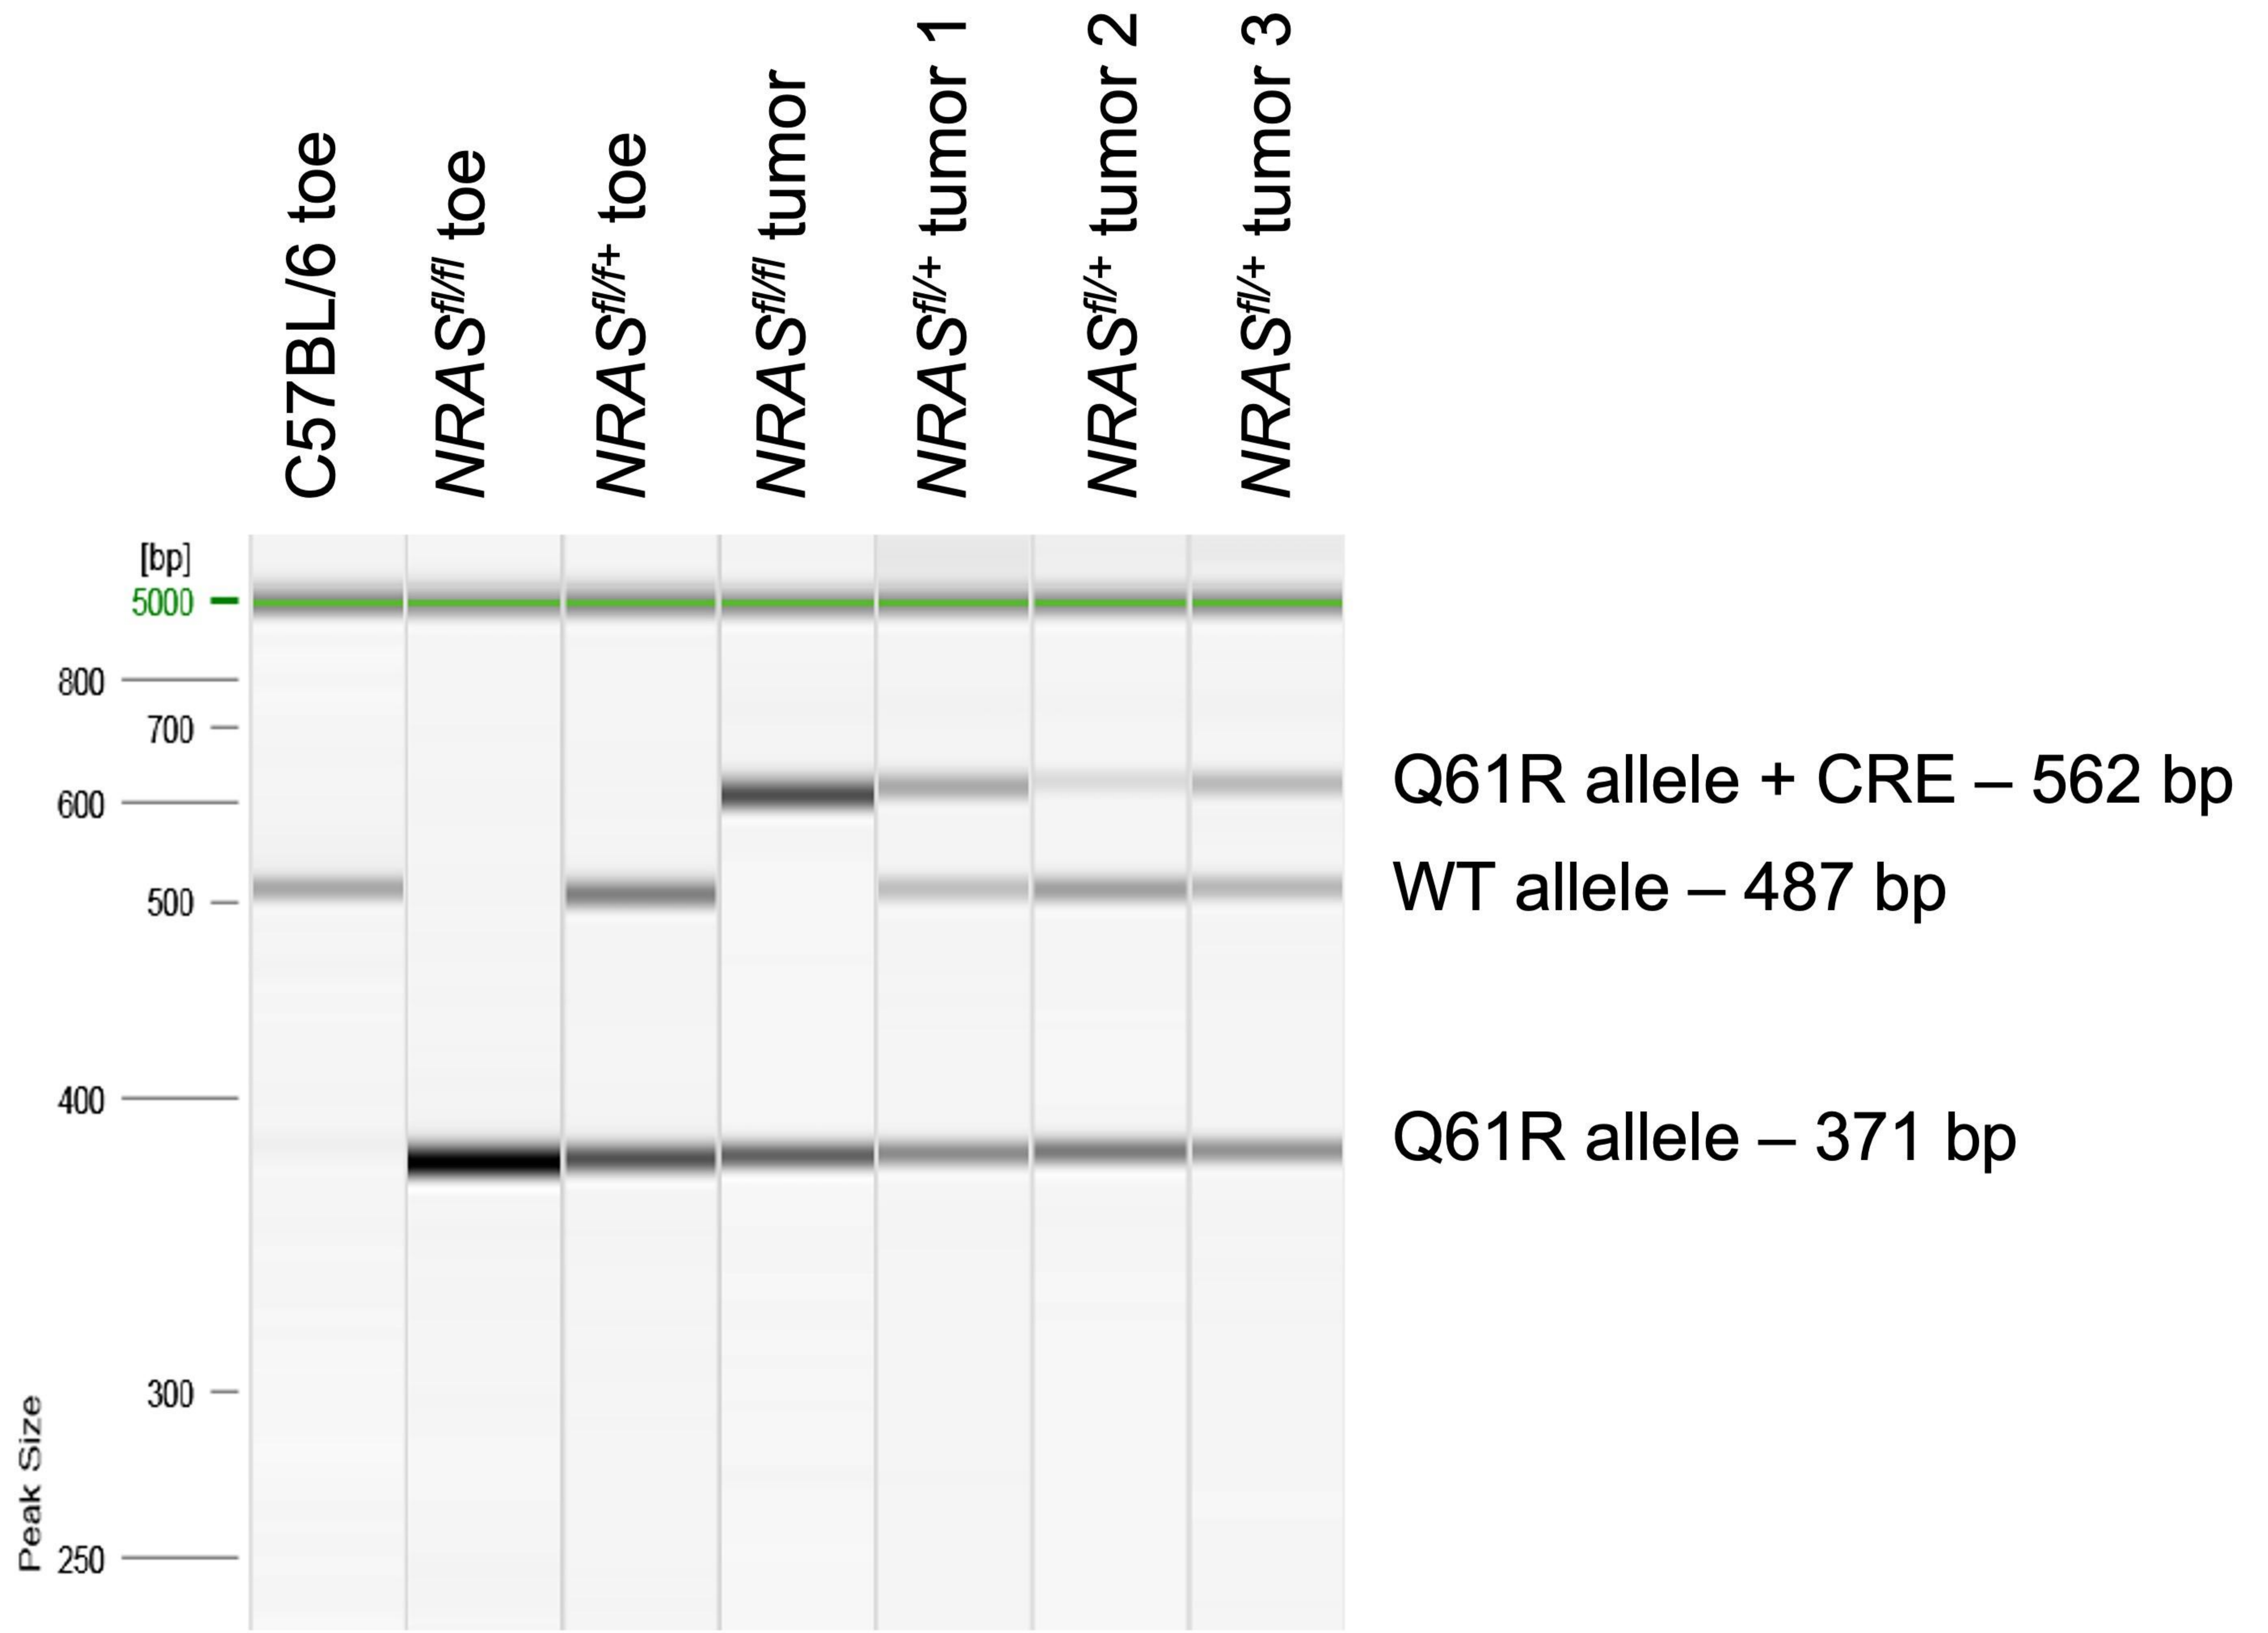

Supplement: NIHMS1805424-supplement-Figure_S3.pdf [file NIHMS1805424-supplement-Figure_S3.pdf]

Figure S4

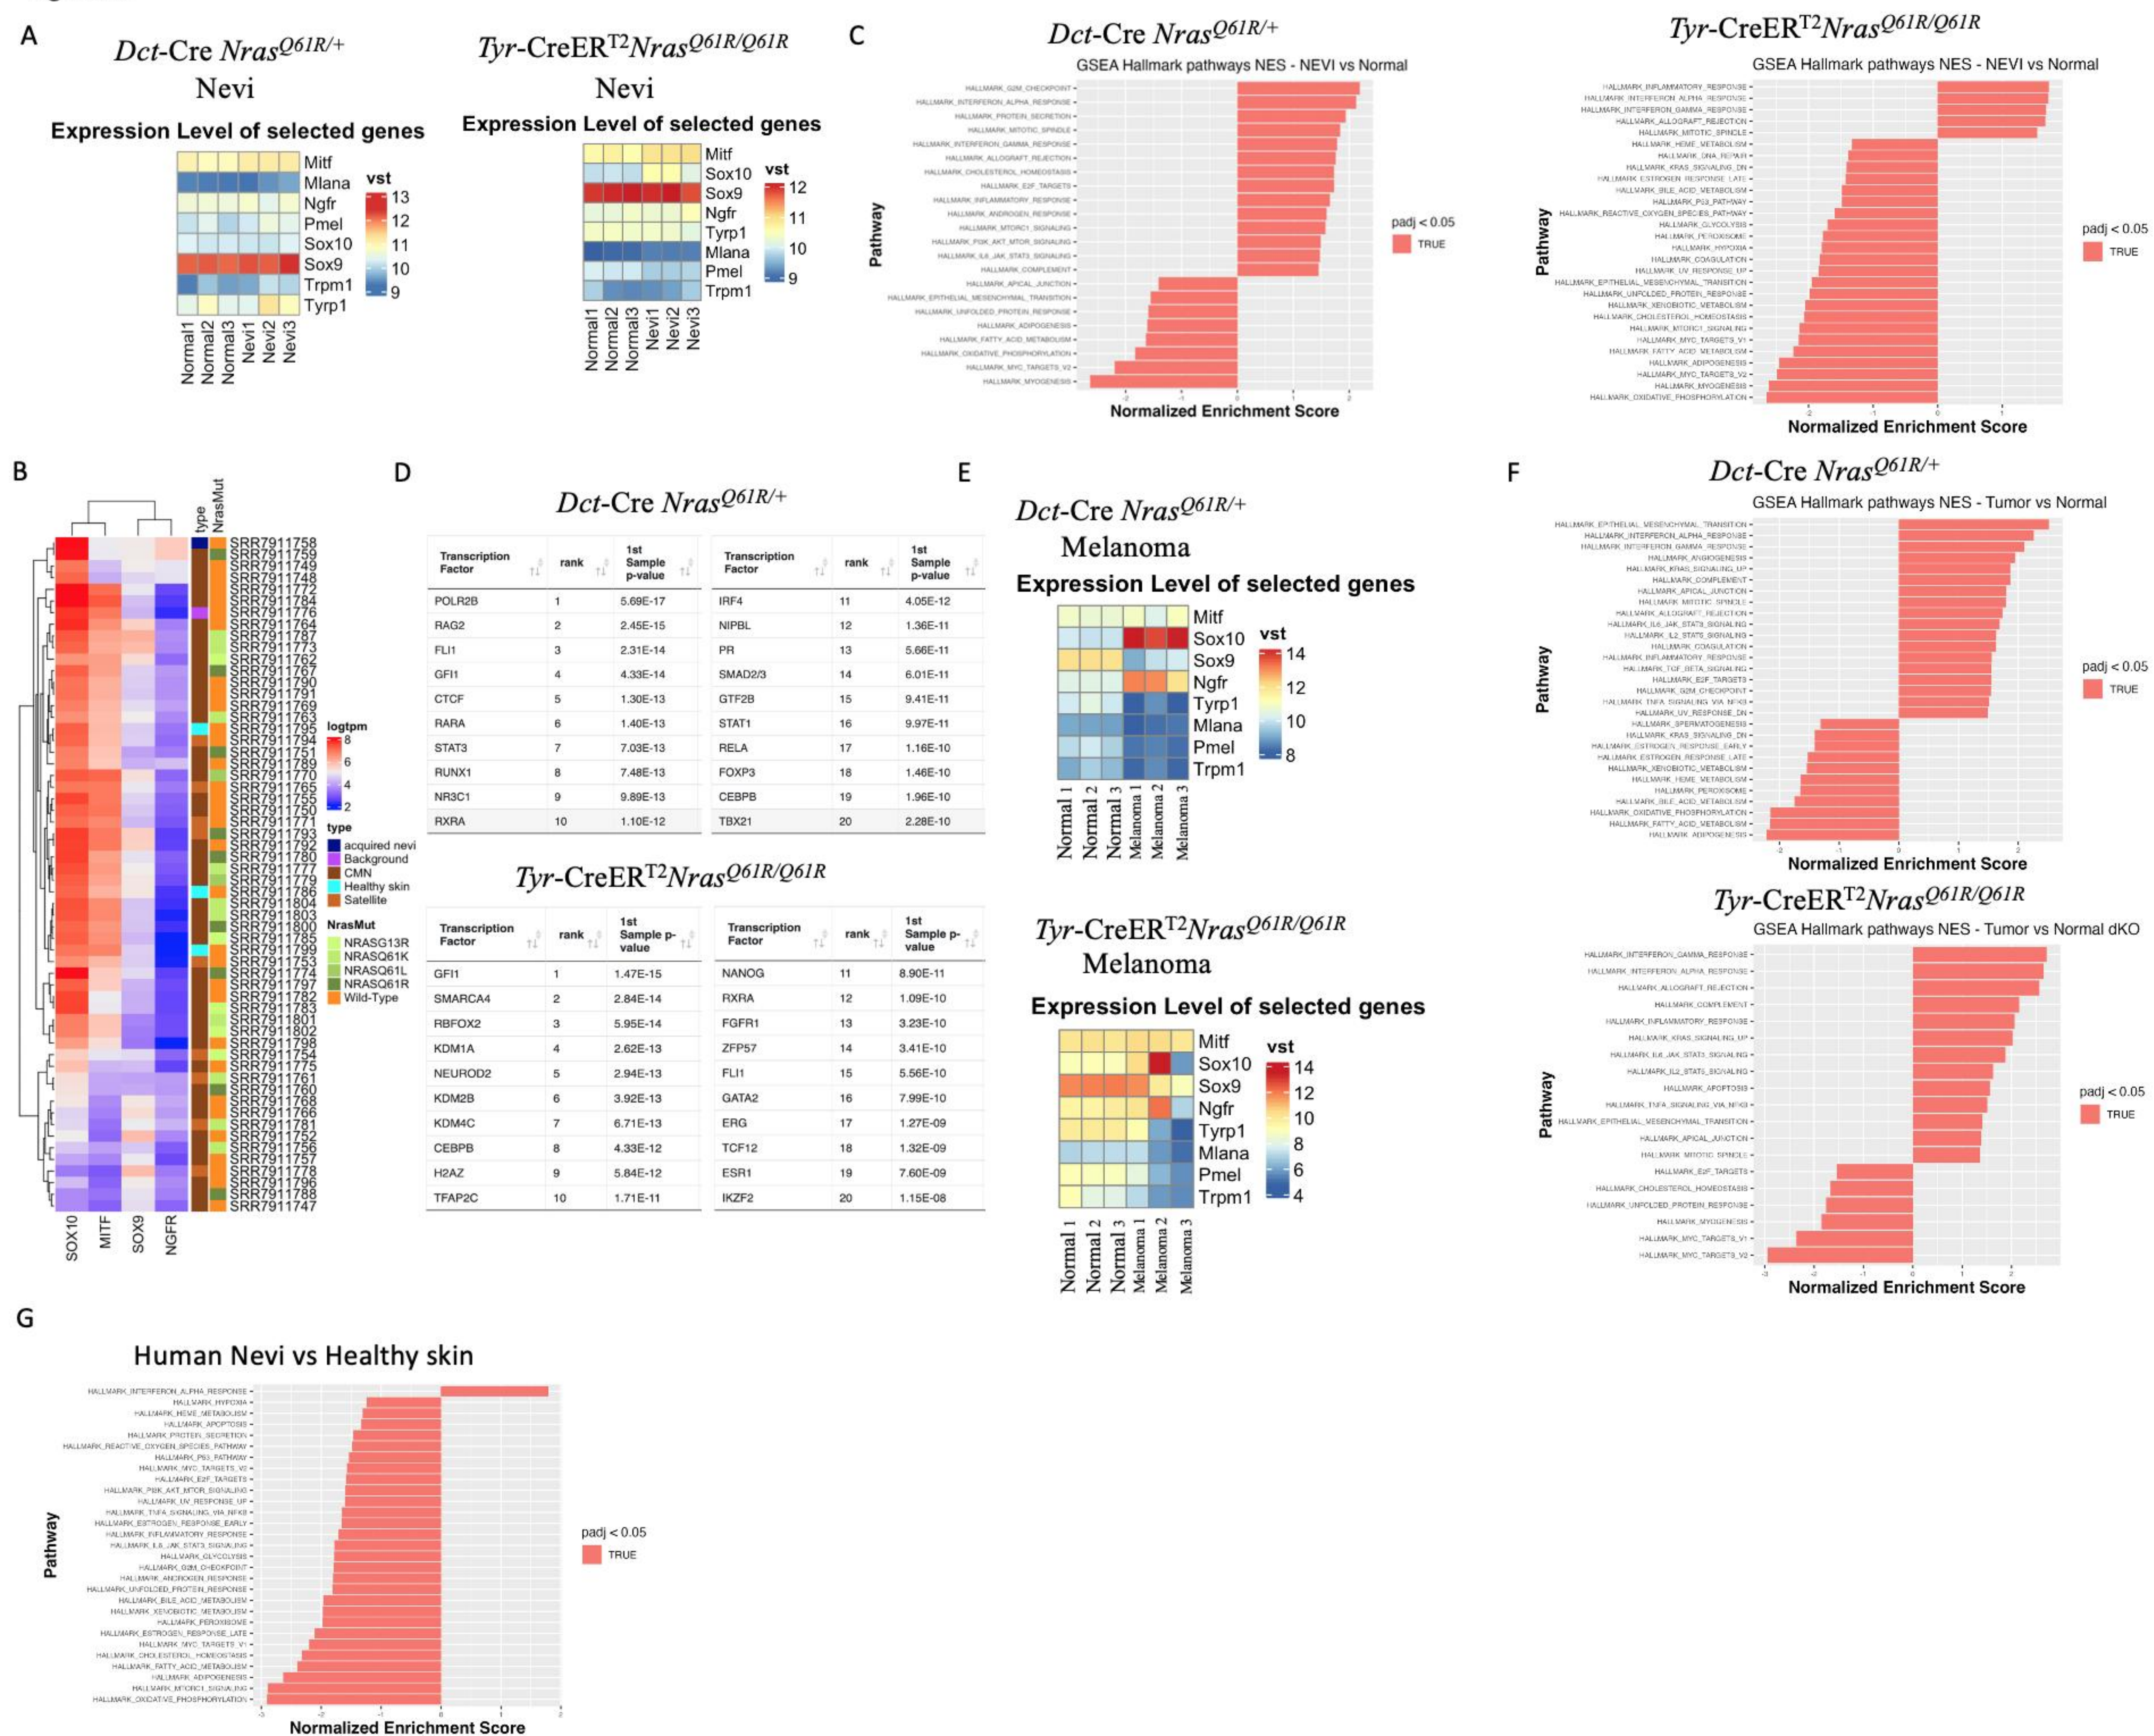

Supplement: NIHMS1805424-supplement-Figure_S4.pdf [file NIHMS1805424-supplement-Figure_S4.pdf]

# Figure S5

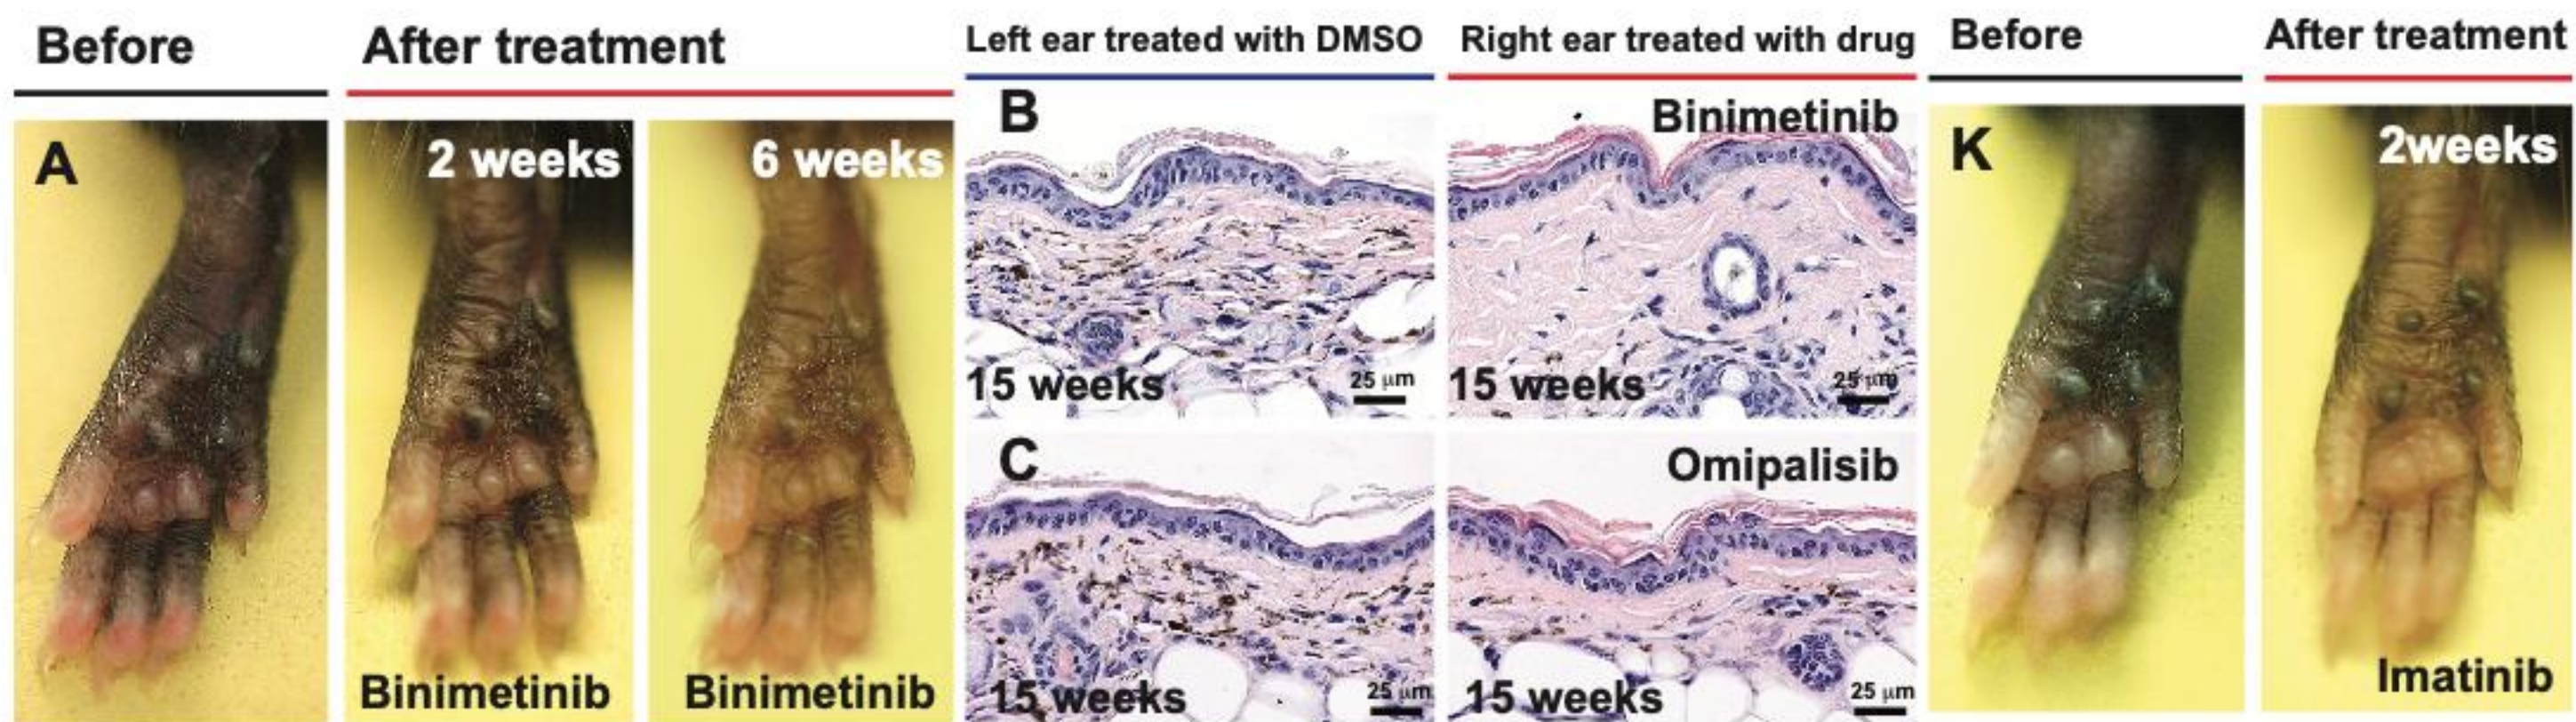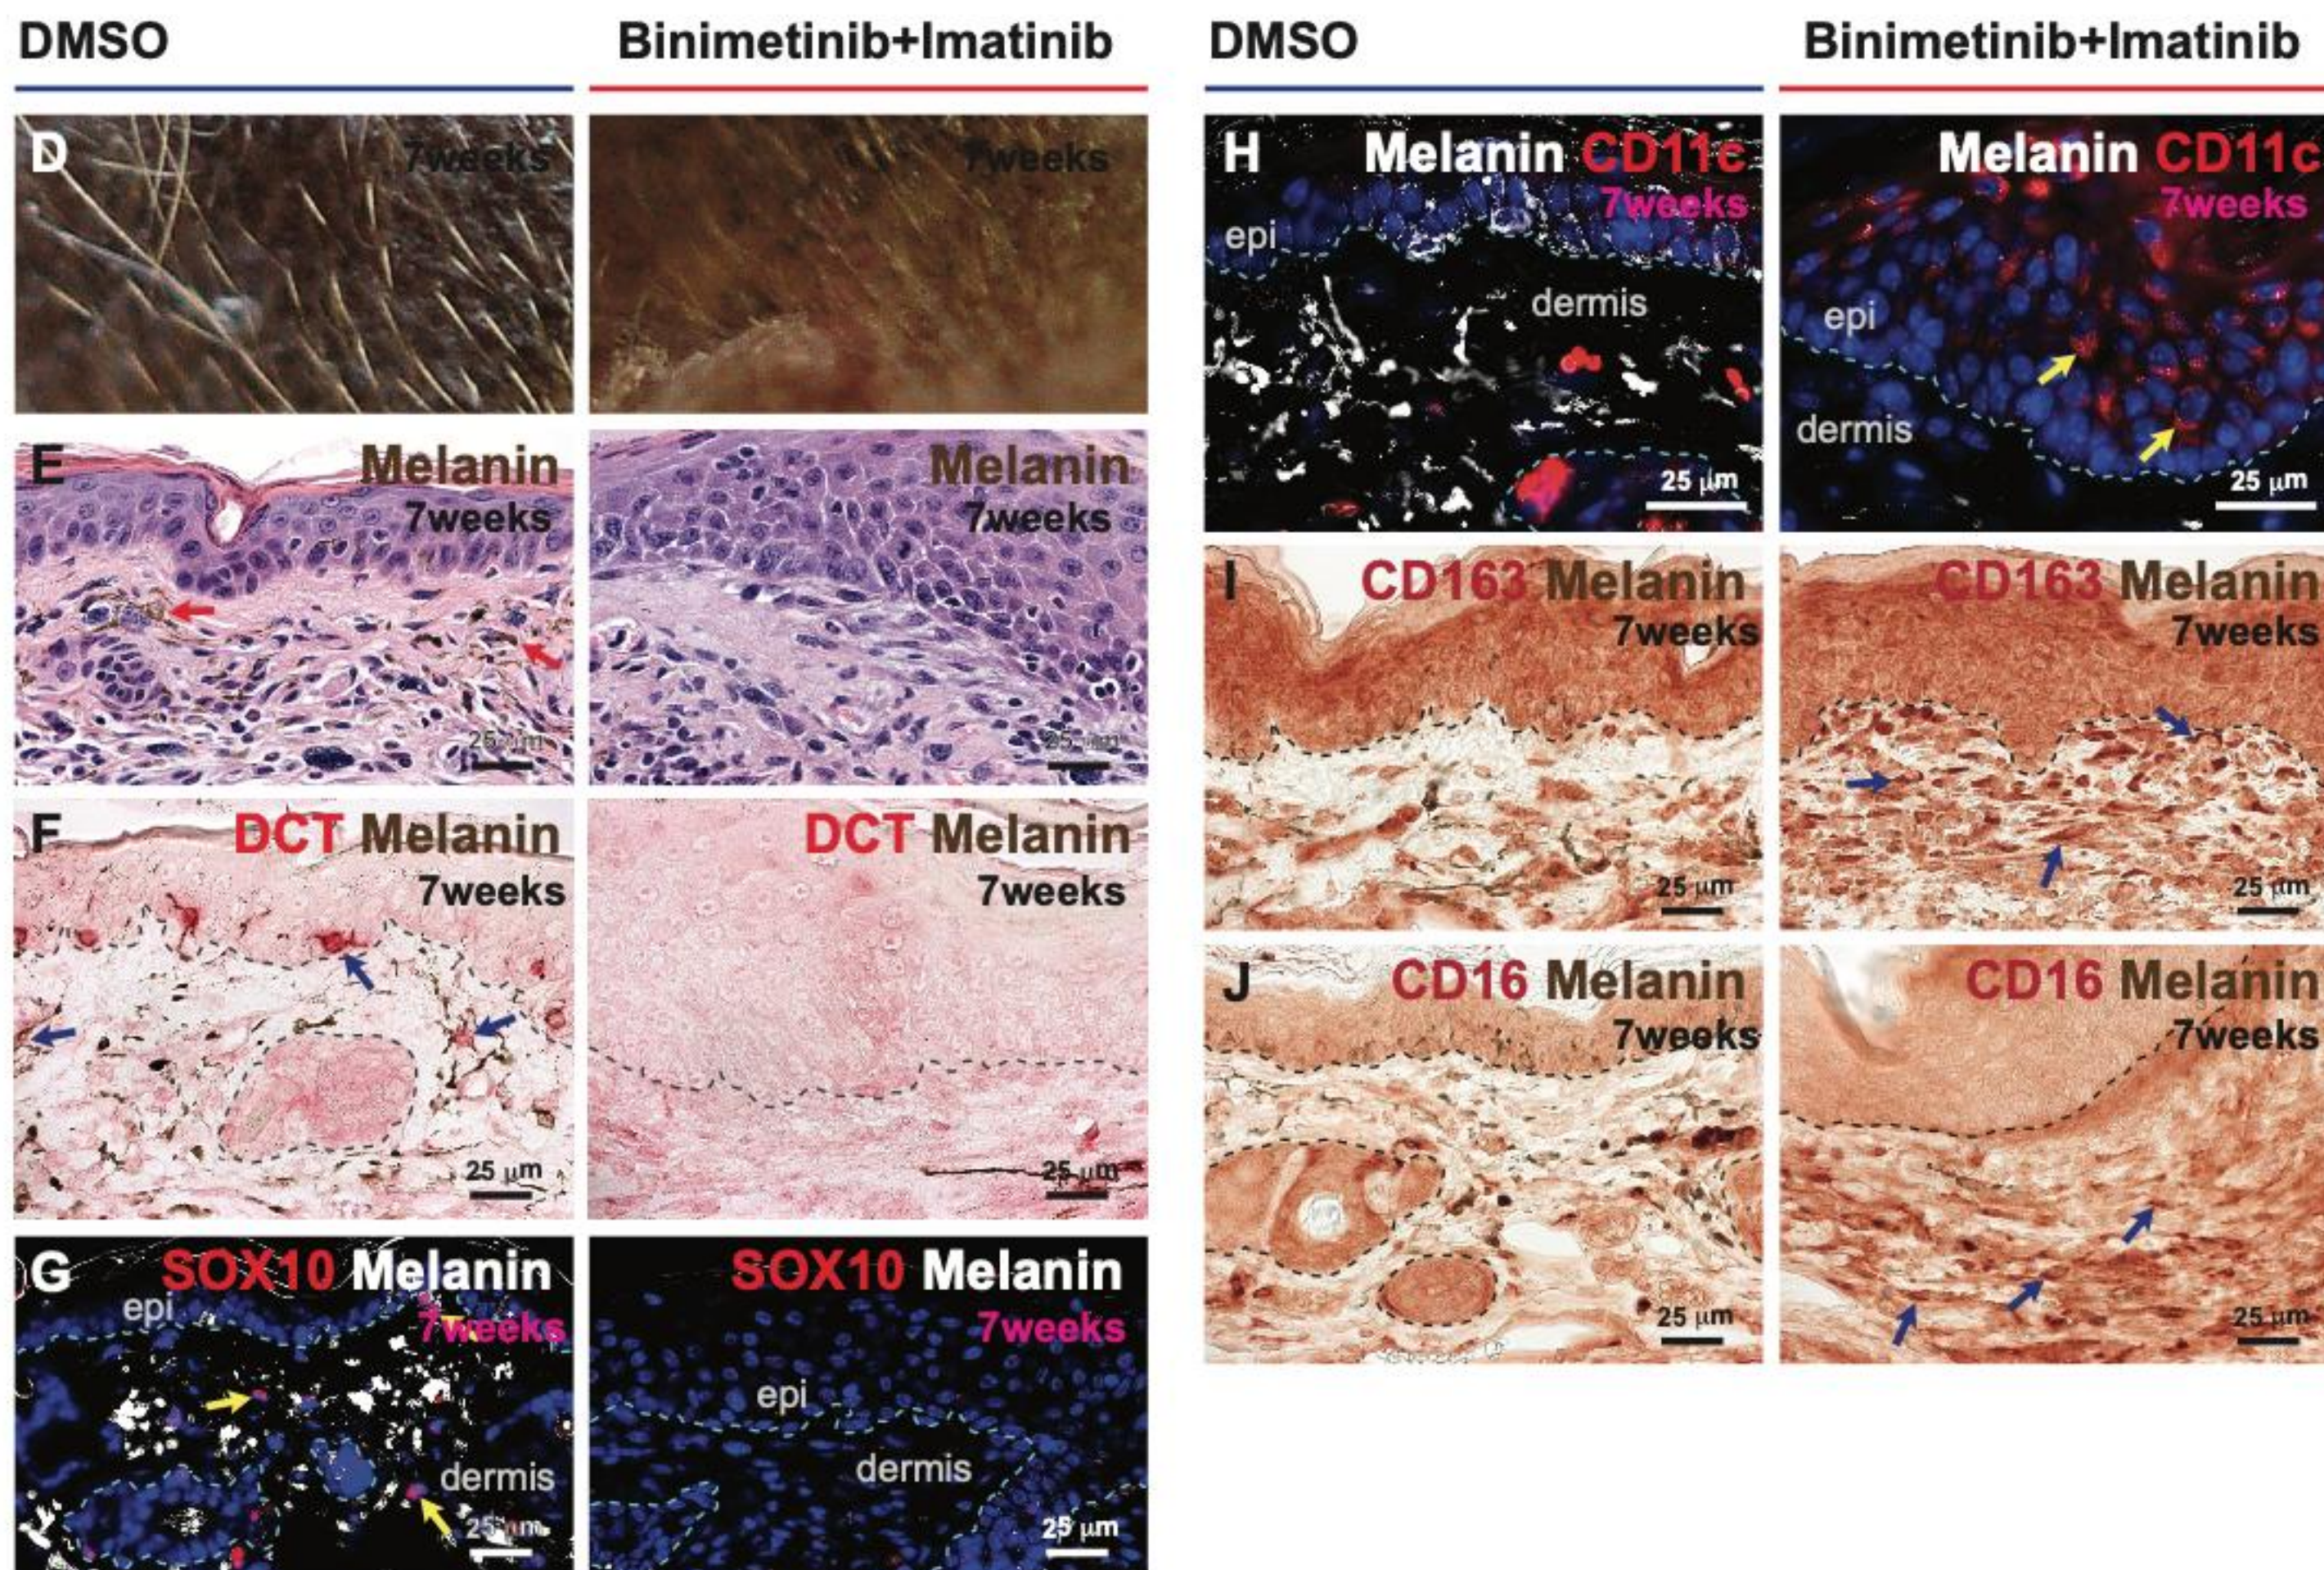

Supplement: NIHMS1805424-supplement-Figure_S5.pdf [file NIHMS1805424-supplement-Figure_S5.pdf]

Figure S6

**A** Acetone

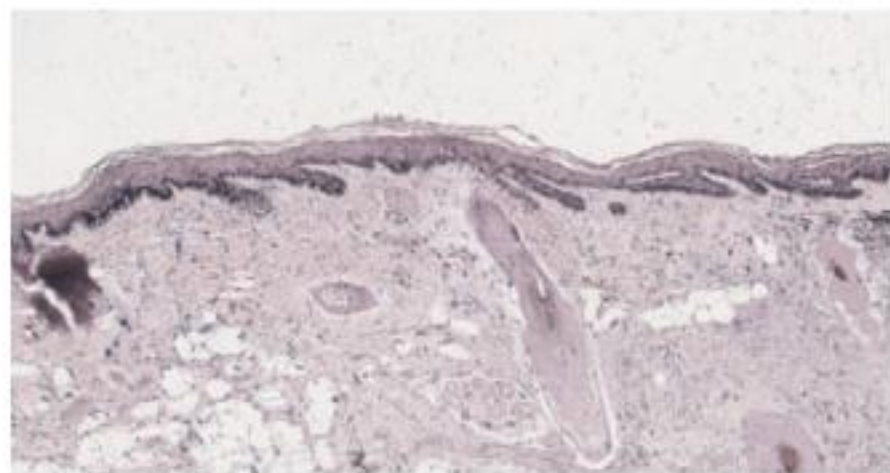

**1% SADB**

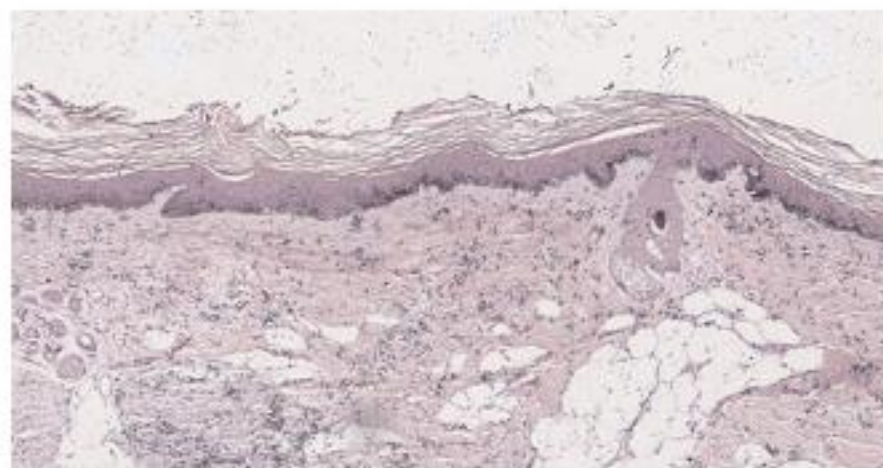

**B**

Acetone

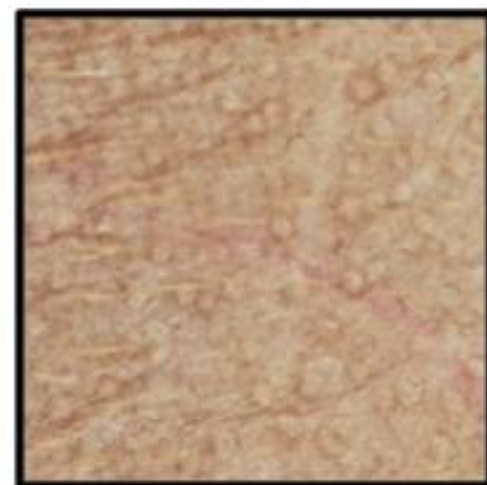

Left ear

0.5% SADBEX6

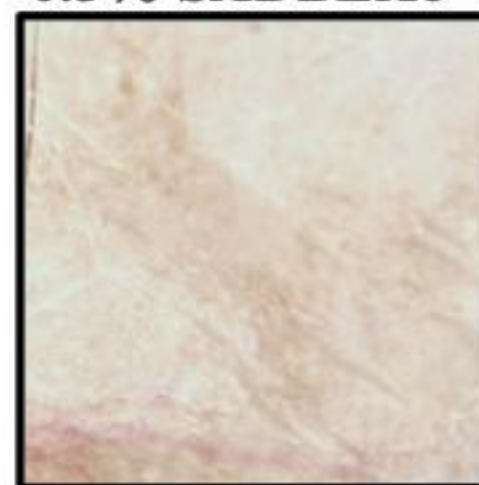

Right ear

Supplement: NIHMS1805424-supplement-Figure_S6.pdf [file NIHMS1805424-supplement-Figure_S6.pdf]
